# Supplementary material
Source: PubMed Central journal article supplement (PMC6724414)
Supplement: jamacardiol-4-1122-s001.pdf [file jamacardiol-4-1122-s001.pdf]

## Supplementary Online Content

Sepehrvand N, Alemayehu W, Das D, et al. Trends in the explanatory or pragmatic nature of cardiovascular clinical trials over 2 decades. *JAMA Cardiol*. Published online September 1, 2019. doi:10.1001/jamacardio.2019.3604

**eTable 1.** Number of randomized clinical trials identified with including different study publication years

**eTable 2.** Level of pragmatism across different design domains

**eTable 3.** PRECIS-2 scores in studies with different levels of risk determined by Cochrane risk of bias tool

**eTable 4.** Study characteristics between pragmatic and non-pragmatic randomized clinical trials

**eTable 5.** Self-identified pragmatic and explanatory trials

**eTable 6.** PRECIS-2 score across different domains of trial design in self-identified pragmatic or explanatory randomized clinical trials and others

**eTable 7.** Trial phase, placebo use and number of sites in self-identified pragmatic and explanatory trials compared to others

**eTable 8.** Number of studies with  $\geq 1$ ,  $\geq 2$ , and  $\geq 3$  difference between two adjudicators for each PRECIS-2 domain

**eFigure 1.** The PRagmatic-Explanatory Continuum Indicator Summary 2 (PRECIS-2) wheel

**eFigure 2.** PRECIS-2 score across different domains of trial design

**eFigure 3.** The level of pragmatism between trials published in different journals (e3A) and journal categories (e3B), the trend over time of pragmatism (e3C), and PRECIS-2 scores across different domains between general medicine and cardiology journals (e3D)

**eFigure 4.** PRECIS-2 score between self-identified pragmatic and explanatory trials compared to others

**eReferences.**

This supplementary material has been provided by the authors to give readers additional information about their work.

**eTable 1.** Number of randomized clinical trials identified with including different study publication years

| <b>Journal Name</b> | <b>RCTs (2000-2015)</b> | <b>RCTs (2006-2015)</b> | <b>RCTs (2011-2015)</b> | <b>2006, 2009, 2012, 2015</b> | <b>2000, 2005, 2010, 2015</b> |
|---------------------|-------------------------|-------------------------|-------------------------|-------------------------------|-------------------------------|
| NEJM                | 578                     | 407                     | 209                     | 170                           | 161                           |
| JAMA                | 314                     | 185                     | 99                      | 66                            | 63                            |
| Lancet              | 396                     | 240                     | 119                     | 102                           | 123                           |
| JACC                | 1206                    | 706                     | 358                     | 277                           | 308                           |
| Circulation         | 1142                    | 541                     | 256                     | 224                           | 309                           |
| EHJ                 | 754                     | 487                     | 223                     | 235                           | 221                           |
| <b>Total</b>        | <b>4,390</b>            | <b>2,566</b>            | <b>1,264</b>            | <b>1074</b>                   | <b>1185</b>                   |

EHJ: European Heart Journal; JACC: Journal of American College of Cardiology; JAMA: Journal of American Medical Association; NEJM: New England Journal of Medicine; RCT: randomized clinical trial;

**eTable 2.** Level of pragmatism across different design domains

| <b>Design domains</b>                        | <b>N (%)</b> | <b>Mean (SD)</b> |
|----------------------------------------------|--------------|------------------|
| <b>Eligibility Criteria</b>                  | 615          | 3.06 (0.98)      |
| Very explanatory (1)                         | 11 (1.8)     |                  |
| Rather explanatory (>1 and <3)               | 233 (37.8)   |                  |
| Equally pragmatic/ explanatory (3)           | 111 (18.0)   |                  |
| Rather pragmatic (>3 and <5)                 | 233 (37.8)   |                  |
| Very pragmatic (5)                           | 27 (4.4)     |                  |
| Unclear                                      | 1 (0.2)      |                  |
| <b>Recruitment path</b>                      | 543          | 3.65 (1.18)      |
| Very explanatory                             | 31 (5.0)     |                  |
| Rather explanatory                           | 90 (14.6)    |                  |
| Equally pragmatic/ explanatory               | 55 (8.9)     |                  |
| Rather pragmatic                             | 248 (40.3)   |                  |
| Very pragmatic                               | 119 (19.3)   |                  |
| Unclear                                      | 73 (11.9)    |                  |
| <b>Setting</b>                               | 616          | 3.40 (1.10)      |
| Very explanatory                             | 20 (3.2)     |                  |
| Rather explanatory                           | 146 (23.7)   |                  |
| Equally pragmatic/ explanatory               | 93 (15.1)    |                  |
| Rather pragmatic                             | 289 (46.9)   |                  |
| Very pragmatic                               | 68 (11.0)    |                  |
| <b>Organizational intervention</b>           | 613          | 3.26 (1.02)      |
| Very explanatory                             | 15 (2.4)     |                  |
| Rather explanatory                           | 176 (28.6)   |                  |
| Equally pragmatic/ explanatory               | 106 (17.2)   |                  |
| Rather pragmatic                             | 277 (45.0)   |                  |
| Very pragmatic                               | 39 (6.3)     |                  |
| Unclear                                      | 3 (0.5)      |                  |
| <b>Flexibility of Intervention-Delivery</b>  | 614          | 3.10 (0.99)      |
| Very explanatory                             | 15 (2.4)     |                  |
| Rather explanatory                           | 209 (33.9)   |                  |
| Equally pragmatic/ explanatory               | 114 (18.5)   |                  |
| Rather pragmatic                             | 255 (41.4)   |                  |
| Very pragmatic                               | 21 (3.4)     |                  |
| Unclear                                      | 2 (0.3)      |                  |
| <b>Flexibility of Intervention-Adherence</b> | 358          | 2.99 (1.18)      |
| Very explanatory                             | 34 (5.5)     |                  |
| Rather explanatory                           | 119 (19.3)   |                  |
| Equally pragmatic/ explanatory               | 61 (9.9)     |                  |
| Rather pragmatic                             | 105 (17.0)   |                  |
| Very pragmatic                               | 39 (6.3)     |                  |
| Unclear or NA                                | 258 (41.9)   |                  |
| <b>Follow-up</b>                             | 615          | 3.16 (1.00)      |
| Very explanatory                             | 13 (2.1)     |                  |

|                                        |            |             |
|----------------------------------------|------------|-------------|
| Rather explanatory                     | 197 (32.0) |             |
| Equally pragmatic/ explanatory         | 116 (18.8) |             |
| Rather pragmatic                       | 263 (42.7) |             |
| Very pragmatic                         | 26 (4.2)   |             |
| Unclear                                | 1 (0.2)    |             |
| <b>Outcome</b>                         | 616        | 2.84 (1.24) |
| Very explanatory                       | 74 (12.0)  |             |
| Rather explanatory                     | 228 (37.0) |             |
| Equally pragmatic/ explanatory         | 88 (14.3)  |             |
| Rather pragmatic                       | 174 (28.2) |             |
| Very pragmatic                         | 52 (8.4)   |             |
| <b>Analysis</b>                        | 611        | 3.79 (1.03) |
| Very explanatory                       | 13 (2.1)   |             |
| Rather explanatory                     | 85 (13.8)  |             |
| Equally pragmatic/ explanatory         | 80 (13.0)  |             |
| Rather pragmatic                       | 317 (51.5) |             |
| Very pragmatic                         | 116 (18.8) |             |
| Unclear                                | 5 (0.8)    |             |
| <b>PRECIS Summary Score, mean ± SD</b> | 616        | 3.26±0.70   |

SD: standard deviation; For all domains, the very explanatory, rather explanatory, equally explanatory/pragmatic, rather pragmatic, and very pragmatic categories were defined as the PRECIS-2 score =1, >1 and <3, =3, >3 and <5, and =5, respectively.

### **The Cochrane Risk of Bias score**

The risk of bias in each RCT was assessed using the Cochrane Risk of Bias tool which assesses trials for the sequence generation, allocation sequence concealment, blinding of participants, personnel and outcome assessors, completeness of outcome data, selective outcome reporting, etc.<sup>1</sup> This tool categorizes the risk of bias in each trial to one of the three categories: high, low, and unclear.

Risk of bias was adjudicated to be low, high, and unclear, respectively in 178, 211, and 227 studies. The PRECIS-2 score was higher in the high-risk studies as compared to low-risk RCTs (eTable 3).

**eTable 3.** PRECIS-2 scores in studies with different levels of risk determined by Cochrane risk of bias tool

| <b>Factors</b>        | <b>N (%)</b> | <b>Mean Score (SD)</b> | <b>Effect size: Cohen's D</b> | <b>P-value</b> |
|-----------------------|--------------|------------------------|-------------------------------|----------------|
| Overall               | 616          | 3.26(0.70)             |                               |                |
| Cochrane Risk of Bias |              |                        |                               | <.0001         |
| Low risk              | 178(28.9)    | 3.29(0.66)             | Ref                           |                |
| High risk             | 211(34.3)    | 3.42(0.67)             | 0.19                          |                |
| Unclear risk          | 227(36.9)    | 3.09(0.71)             | -0.29                         |                |

SD: standard deviation;

**eTable 4.** Study characteristics between pragmatic and non-pragmatic randomized clinical trials

| Factors                                     | N (%)         | Pragmatic       | Not Pragmatic | P-value |
|---------------------------------------------|---------------|-----------------|---------------|---------|
| Overall                                     | <b>616</b>    | <b>105</b>      | <b>511</b>    |         |
| Year of publication                         |               |                 |               | 0.0898  |
| 2000                                        | 172 (27.9)    | 24 (22.9)       | 148 (29.0)    |         |
| 2005                                        | 168 (27.3)    | 24 (22.9)       | 144 (28.2)    |         |
| 2010                                        | 137 (22.2)    | 24 (22.9)       | 113 (22.1)    |         |
| 2015                                        | 139 (22.6)    | 33 (31.4)       | 106 (20.7)    |         |
| Journal                                     |               |                 |               | <.0001  |
| General Medicine:<br>NEJM/Lancet/JAMA       | 224 (36.4)    | 64 (61.0)       | 160 (31.3)    |         |
| Cardiology:<br>EHJ/JACC/Circulation         | 392 (63.6)    | 41 (39.0)       | 351 (68.7)    |         |
| Trial phase                                 |               |                 |               | <.0001  |
| I/II                                        | 267 (44.5)    | 21 (20.8)       | 246 (49.3)    |         |
| III/IV                                      | 333 (55.5)    | 80 (79.2)       | 253 (50.7)    |         |
| Single Centre                               | 185 (30.4)    | 15 (14.4)       | 170 (33.7)    | <.0001  |
| Multi-national                              | 238 (38.8)    | 54 (51.9)       | 184 (36.1)    | 0.0025  |
| Sample size, median<br>(IQR)                | 297 (92, 922) | 897 (304, 2332) | 221 (66, 652) | <.0001  |
| Follow-up duration,<br>median (IQR)         | 6 (3, 16)     | 12 (5, 36)      | 6 (2, 13)     | 0.0011  |
| Cross-over design                           |               |                 |               | 0.0169  |
| No                                          | 568 (92.5)    | 103 (98.1)      | 465 (91.4)    |         |
| Yes                                         | 46 (7.5)      | 2 (1.9)         | 44 (8.6)      |         |
| Cluster-randomized                          |               |                 |               | 0.8452  |
| No                                          | 609 (98.9)    | 104 (99.0)      | 505 (98.8)    |         |
| Yes                                         | 7 (1.1)       | 1 (1.0)         | 6 (1.2)       |         |
| Number of arms                              |               |                 |               | 0.5388  |
| 1-2                                         | 491 (79.7)    | 86 (81.9)       | 405 (79.3)    |         |
| ≥3                                          | 125 (20.3)    | 19 (18.1)       | 106 (20.7)    |         |
| Type of Intervention                        |               |                 |               | 0.0031  |
| Medicinal                                   | 343 (55.7)    | 43 (41.0)       | 300 (58.7)    |         |
| Procedure or device                         | 193 (31.3)    | 42 (40.0)       | 151 (29.5)    |         |
| Behavioral or Health<br>system intervention | 80 (13.0)     | 20 (19.0)       | 60 (11.7)     |         |
| Placebo-controlled                          |               |                 |               | 0.0044  |
| No                                          | 382 (62.0)    | 78 (74.3)       | 304 (59.5)    |         |
| Yes                                         | 234 (38.0)    | 27 (25.7)       | 207 (40.5)    |         |
| Blinding of participants<br>and personnel   |               |                 |               | 0.0269  |
| No                                          | 312 (51.2)    | 63 (61.2)       | 249 (49.2)    |         |
| Yes                                         | 297 (48.8)    | 40 (38.8)       | 257 (50.8)    |         |
| Blinding of outcome<br>assessors            |               |                 |               | 0.9058  |
| No                                          | 74 (12.7)     | 12 (12.4)       | 62 (12.8)     |         |

|                                                               |            |           |            |        |
|---------------------------------------------------------------|------------|-----------|------------|--------|
| Yes                                                           | 507 (87.3) | 85 (87.6) | 422 (87.2) |        |
| Primary outcome                                               |            |           |            | <.0001 |
| Mortality                                                     | 27 (4.4)   | 14 (13.3) | 13 (2.5)   |        |
| Mortality in a composite                                      | 168 (27.3) | 51 (48.6) | 117 (22.9) |        |
| Other                                                         | 421 (68.3) | 40 (38.1) | 381 (74.6) |        |
| Trial results                                                 |            |           |            | 0.0883 |
| Neutral (negative)                                            | 180 (29.2) | 37 (35.2) | 143 (28.0) |        |
| Negative for primary but positive for 2 <sup>o</sup> outcomes | 56 (9.1)   | 13 (12.4) | 43 (8.4)   |        |
| Positive for 1 <sup>o</sup> outcome                           | 380 (61.7) | 55 (52.4) | 325 (63.6) |        |
| Type of Funding                                               |            |           |            | 0.2637 |
| Public Only                                                   | 210 (39.3) | 44 (45.8) | 166 (37.9) |        |
| Private Only                                                  | 215 (40.3) | 32 (33.3) | 183 (41.8) |        |
| Public + Private                                              | 109 (20.4) | 20 (20.8) | 89 (20.3)  |        |

EHJ: European Heart Journal; IQR: interquartile range; JACC: Journal of American College of Cardiology; JAMA: Journal of American Medical Association; NEJM: New England Journal of Medicine; ref: reference; SD: standard deviation; In the type of funding, the private category includes both private and industry types of funding.

**eTable 5.** Self-identified pragmatic and explanatory trials

| <b>Self-identified pragmatism</b> | <b>N (%)</b> | <b>PRECIS-2 score<br/>Mean (SD)</b> | <b>Effect size;<br/>Cohen's D</b> | <b>P-value</b> |
|-----------------------------------|--------------|-------------------------------------|-----------------------------------|----------------|
| Not reported                      | 574 (93.2)   | 3.25 (0.68)                         | -ref-                             | <.0001         |
| Self-identified explanatory       | 19 (3.08)    | 2.92 (0.69)                         | 0.49                              |                |
| Self-identified pragmatic         | 23 (3.73)    | 3.83 (0.78)                         | 0.84                              |                |

SD: standard deviation; N: number;



**eTable 6.** PRECIS-2 score across different domains of trial design in self-identified pragmatic or explanatory randomized clinical trials and others

| <b>Domain</b>             | <b>Self-identified Pragmatic</b> | <b>Self-identified Explanatory</b> | <b>Not reported</b> | <b>Δ PRECIS-2 between self-identified pragmatic group vs others</b> |
|---------------------------|----------------------------------|------------------------------------|---------------------|---------------------------------------------------------------------|
| 1. Eligibility            | 3.67                             | 2.55                               | 3.05                | 0.62                                                                |
| 2. Recruitment            | 4.24                             | 2.50                               | 3.67                | 0.57                                                                |
| 3. Setting                | 4.15                             | 3.18                               | 3.38                | 0.78                                                                |
| 4. Organization           | 3.73                             | 2.87                               | 3.26                | 0.47                                                                |
| 5. Intervention delivery  | 3.43                             | 3.00                               | 3.09                | 0.35                                                                |
| 6. Intervention adherence | 3.18                             | 3.00                               | 2.98                | 0.20                                                                |
| 7. Follow-up              | 3.85                             | 2.76                               | 3.15                | 0.70                                                                |
| 8. Primary outcome        | 3.63                             | 2.71                               | 2.81                | 0.82                                                                |
| 9. Analysis               | 4.11                             | 3.66                               | 3.79                | 0.32                                                                |

**eTable 7.** Trial phase, placebo use and number of sites in self-identified pragmatic and explanatory trials compared to others

|                          | <b>Total</b> | <b>Self-identified pragmatic</b> | <b>Self-identified explanatory</b> | <b>Not reported</b> | <b>P-value</b> |
|--------------------------|--------------|----------------------------------|------------------------------------|---------------------|----------------|
| Total N                  | 616          | 23                               | 19                                 | 574                 |                |
| Trial phase              |              |                                  |                                    |                     | 0.0811         |
| I/II                     | 267 (44.5)   | 5 (21.7)                         | 8 (44.4)                           | 254 (45.4)          |                |
| III/IV                   | 333 (55.5)   | 18 (78.3)                        | 10 (55.6)                          | 305 (54.6)          |                |
| Single site, n(%)        | 185 (30.4)   | 8 (36.4)                         | 5 (29.4)                           | 172 (30.2)          | 0.8248         |
| Placebo controlled, n(%) | 234 (38.0)   | 6 (26.1)                         | 10 (52.6)                          | 218 (38.0)          | 0.2109         |

**eTable 8.** Number of studies with  $\geq 1$ ,  $\geq 2$ , and  $\geq 3$  difference between two adjudicators for each PRECIS-2 domain

| PRECIS domains                        | Agreement     |              | Difference between adjudicators |               |               | Mean (SD) difference |
|---------------------------------------|---------------|--------------|---------------------------------|---------------|---------------|----------------------|
|                                       | Equal score   | Both unclear | $\geq 1$                        | $\geq 2$      | $\geq 3$      |                      |
| Eligibility Criteria                  | 186<br>(30.2) | 1 (0.2)      | 429<br>(69.6)                   | 226<br>(36.7) | 107<br>(17.4) | 1.27 (1.34)          |
| Recruitment path                      | 350<br>(56.8) | 73 (11.9)    | 193<br>(31.3)                   | 97<br>(15.7)  | 44 (7.1)      | 0.62 (1.0)           |
| Setting                               | 218<br>(35.4) | -            | 398<br>(64.6)                   | 197<br>(32.0) | 82<br>(13.3)  | 1.13 (1.10)          |
| Organizational intervention           | 212<br>(34.4) | 3 (0.5)      | 401<br>(65.1)                   | 205<br>(33.3) | 87<br>(14.1)  | 1.15 (1.1)           |
| Flexibility of Intervention-Delivery  | 220<br>(35.7) | 2 (0.3)      | 394<br>(64.0)                   | 178<br>(28.9) | 57 (9.3)      | 1.03 (0.98)          |
| Flexibility of Intervention-Adherence | 230<br>(37.3) | 258 (41.9)   | 128<br>(20.8)                   | 73<br>(11.9)  | 35 (5.7)      | 0.68 (1.06)          |
| Follow-up                             | 218<br>(35.4) | 1 (0.2)      | 397<br>(64.4)                   | 177<br>(28.7) | 56 (9.1)      | 1.04 (1.0)           |
| Outcome                               | 196<br>(31.8) | -            | 420<br>(68.2)                   | 234<br>(38.0) | 121<br>(19.6) | 1.31 (1.20)          |
| Analysis                              | 237<br>(38.5) | 5 (0.8)      | 374<br>(60.7)                   | 175<br>(28.4) | 65<br>(10.6)  | 1.04 (1.08)          |

In a sensitivity analysis we evaluated studies with a difference between the assigned scores for each domain by two adjudicators and 20.8-69.6%, 11.9-38.0%, and 5.7-19.6% of studies respectively had a difference between adjudicated scores equal or greater than 1, 2, and 3 across different domains of trial design (eTable 8).

**eFigure 1.** The PRagmatic-Explanatory Continuum Indicator Summary 2 (PRECIS-2) wheel

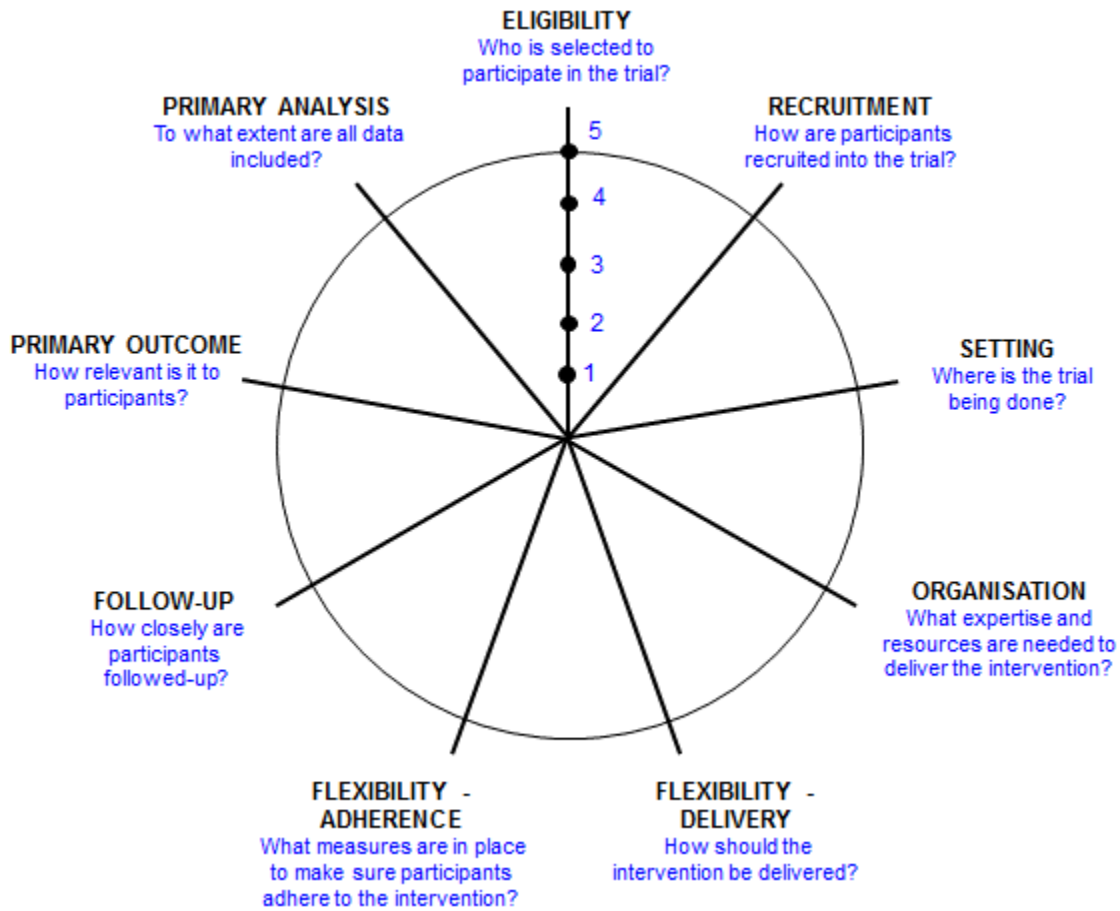

**eFigure 2.** PRECIS-2 score across different domains of trial design

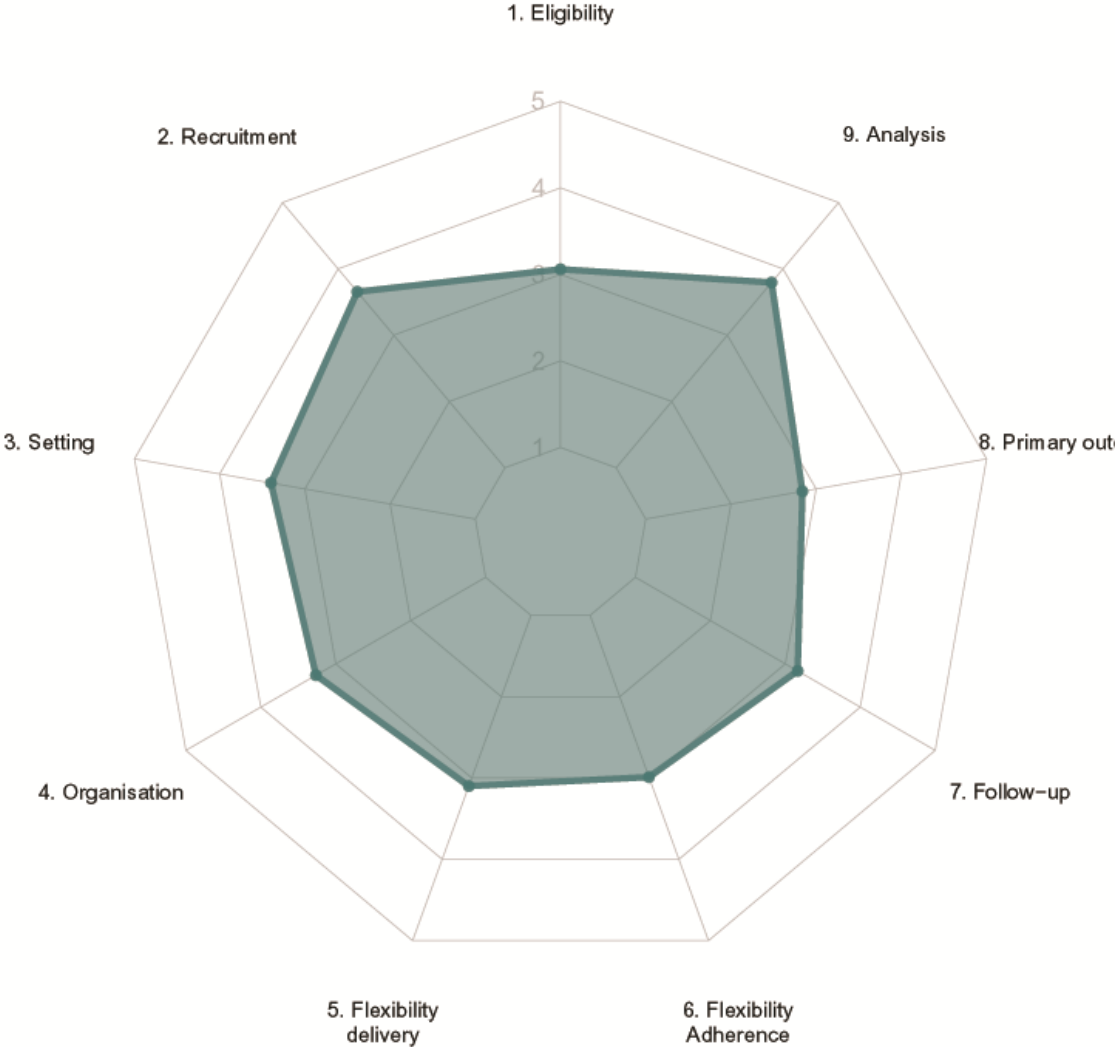

**eFigure 3.** The level of pragmatism between trials published in different journals (e3A) and journal categories (e3B), the trend over time of pragmatism (e3C), and PRECIS-2 scores across different domains between general medicine and cardiology journals (e3D)

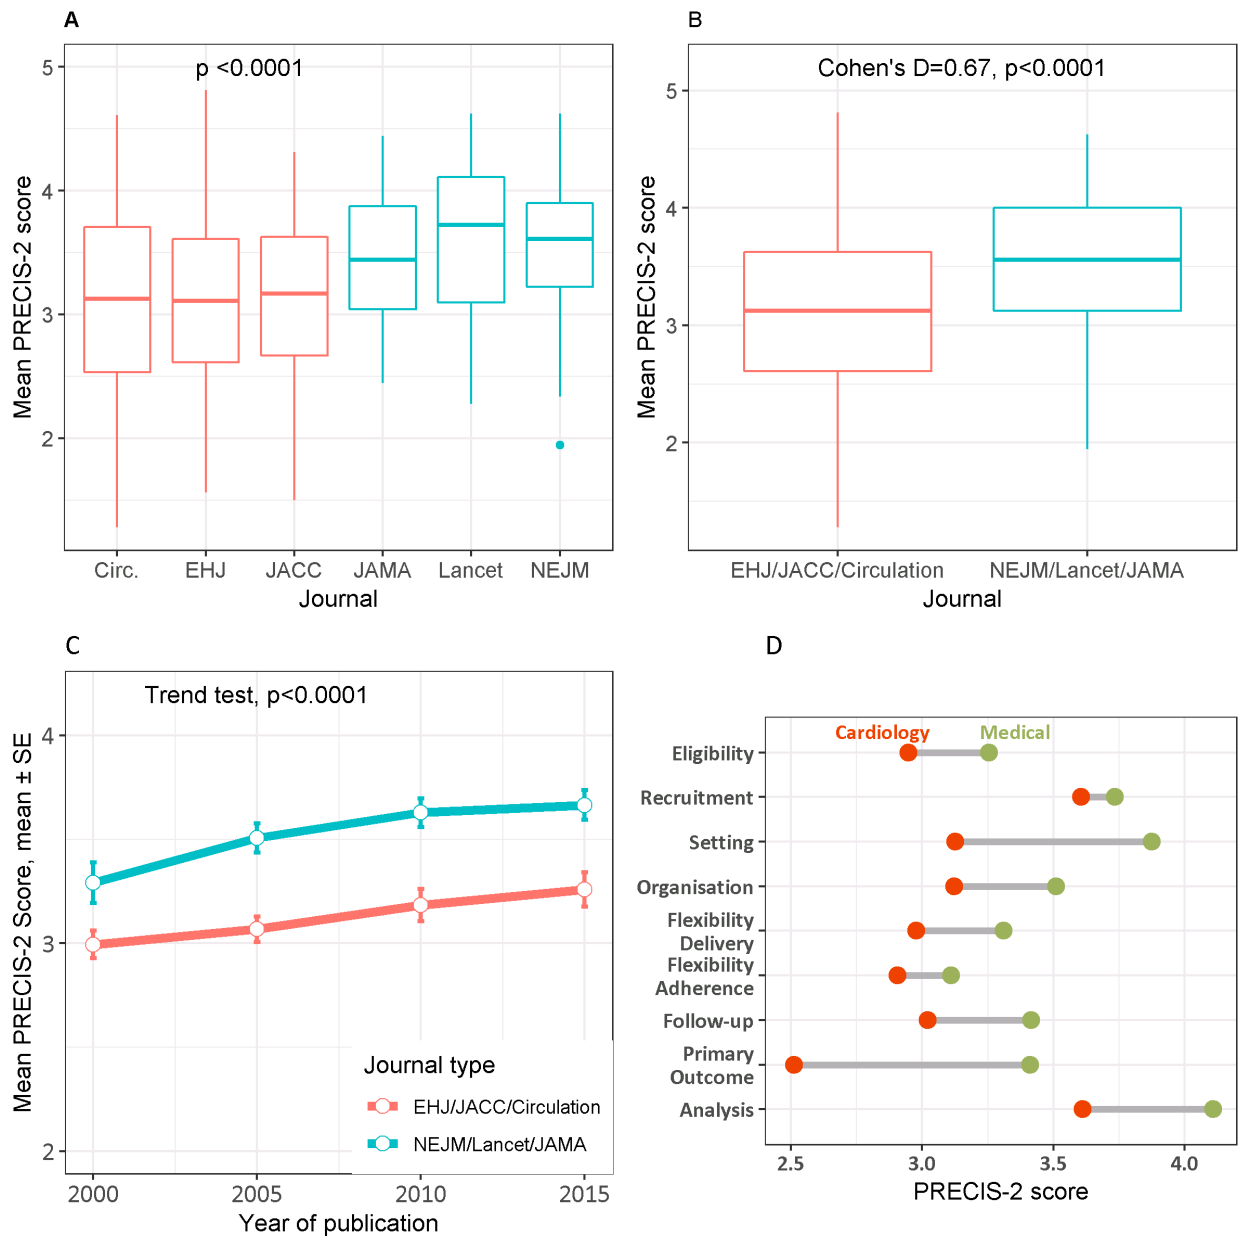

EHJ: European Heart Journal; JACC: Journal of American College of Cardiology; JAMA: Journal of American Medical Association; NEJM: New England Journal of Medicine;

**eFigure 4.** PRECIS-2 score between self-identified pragmatic and explanatory trials compared to others

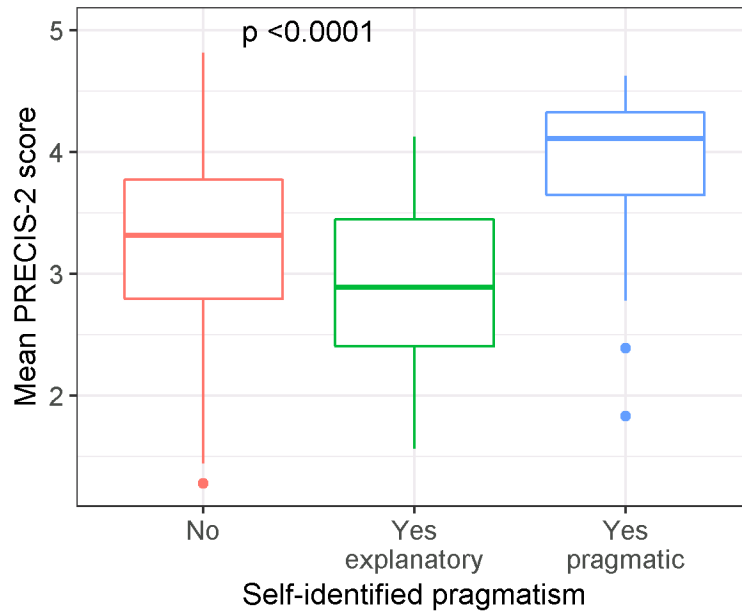

**eReferences.**

1. Higgins JP, Altman DG, Gotzsche PC, et al. The Cochrane Collaboration's tool for assessing risk of bias in randomised trials. *Bmj*. 2011;343:d5928.
